# Supplementary material for: The Usefulness of the Regression-Based Normed SKT Short Cognitive Performance Test in detecting Cognitive Impairment in a Community Sample
Source: Preprints.org preprint supplement (doi:10.20944/preprints202408.1006.v1), 2024-08-14

E-Appendix

Figure 1. ROC curves for the three different tests

1a.ROC for the SKT


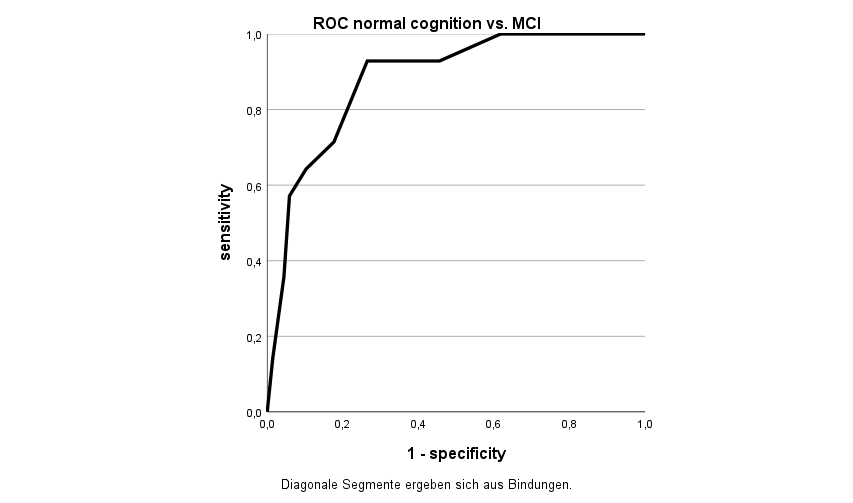

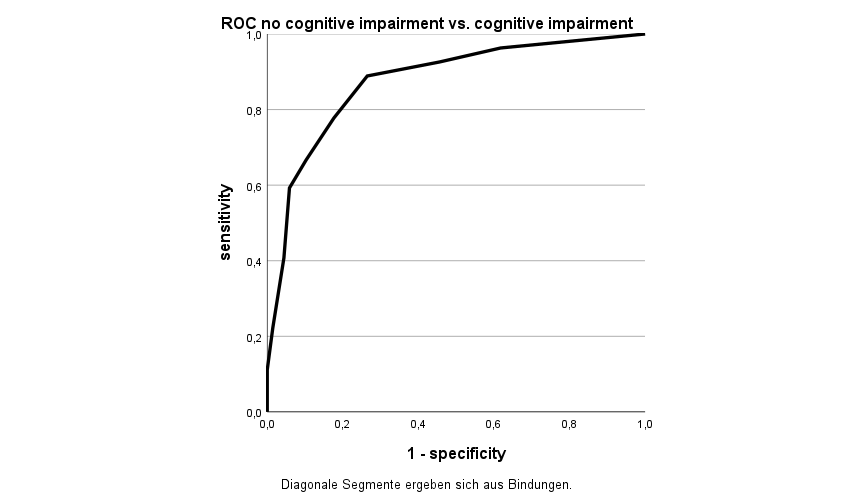


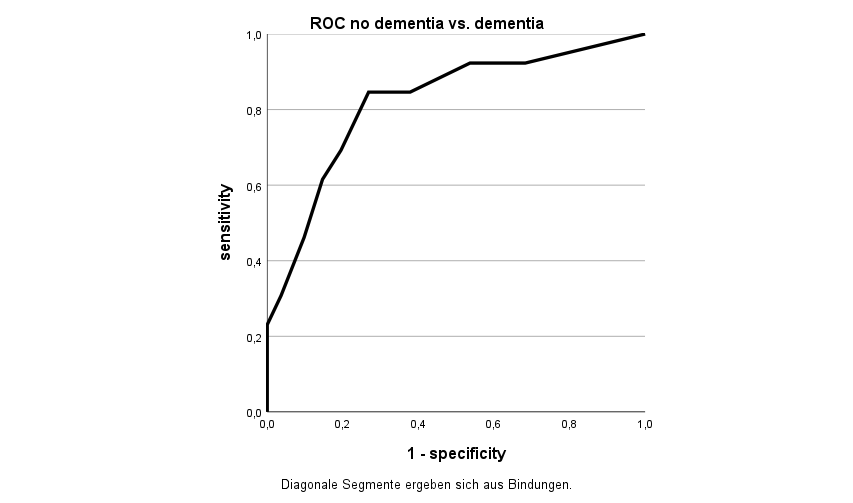


1b. ROC for the MMSE


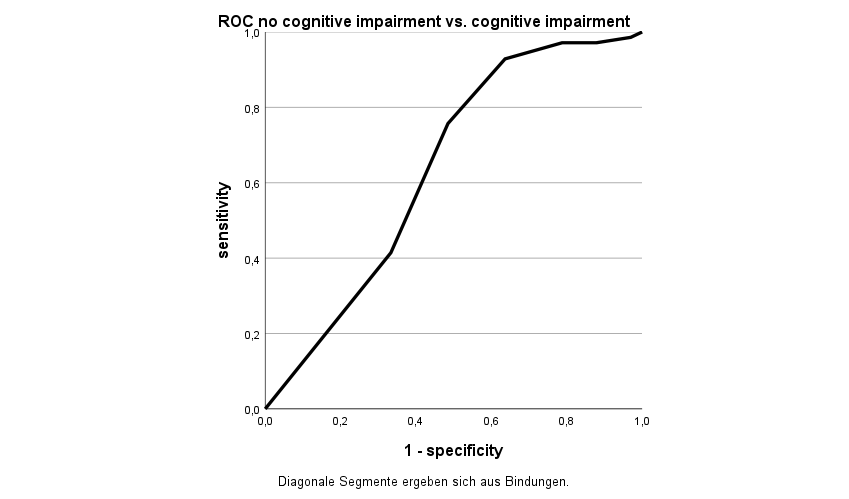

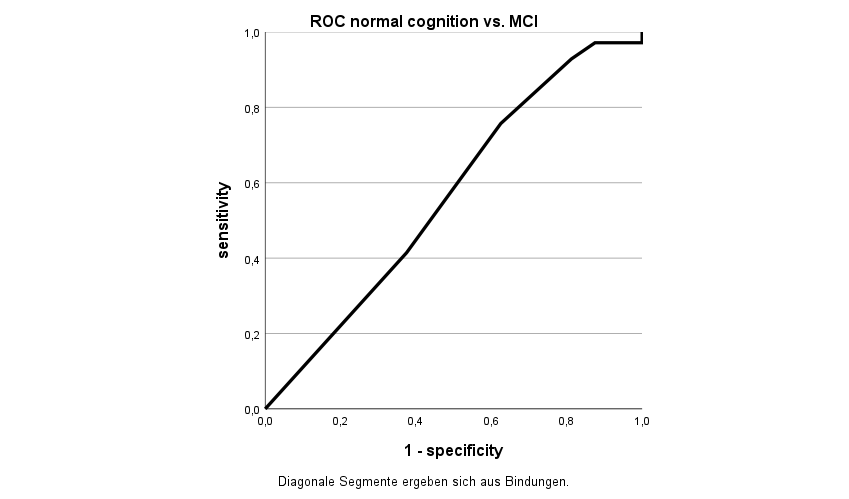


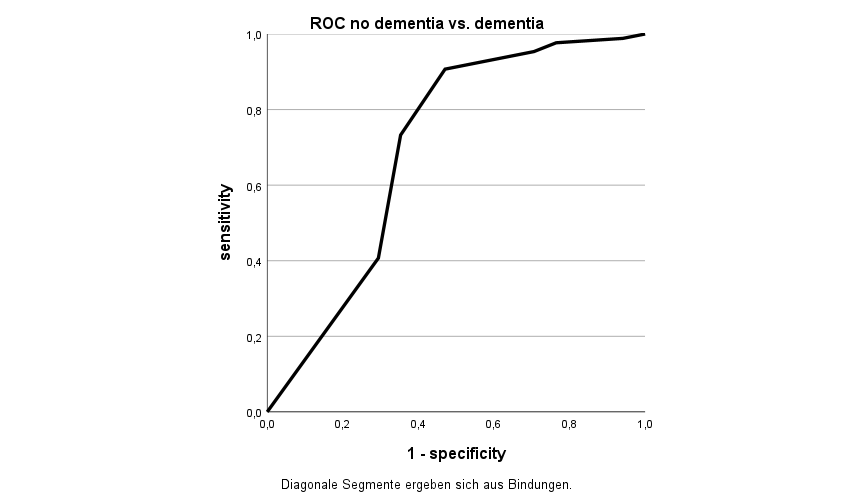


1c. ROC for the ACE-III


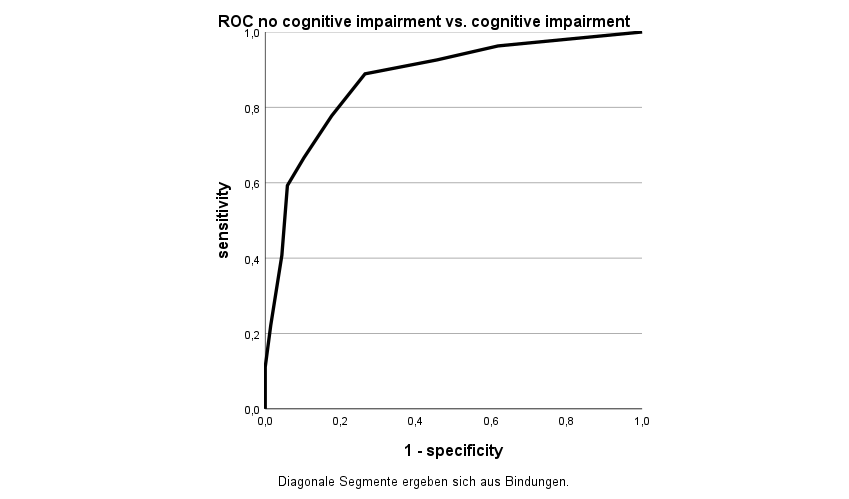

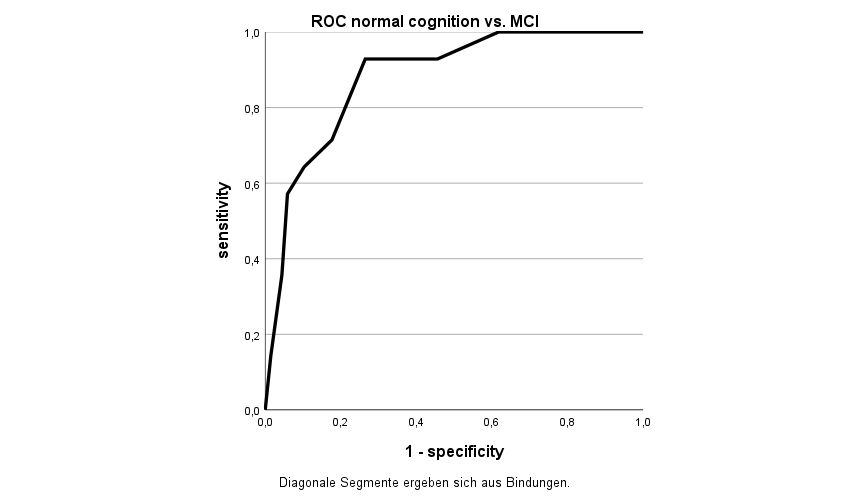


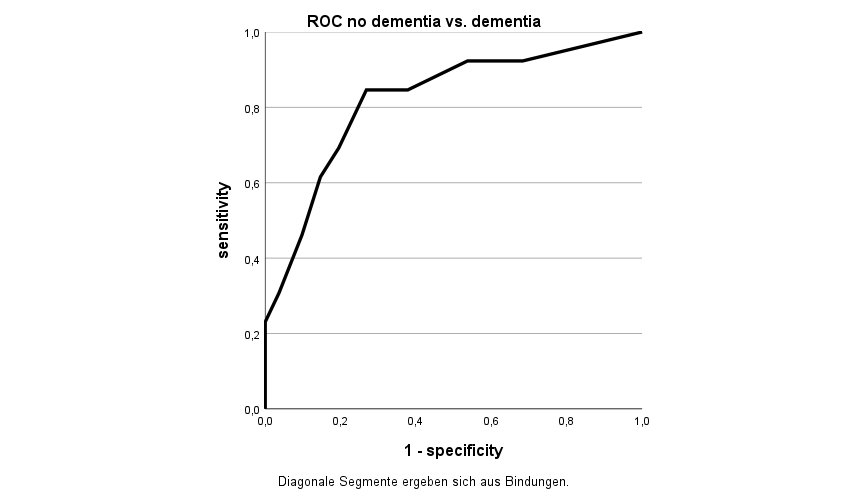

Supplement: Supplementary file 1 [file supplementary]
